# Supplementary material for: Real-world analysis of two ischaemic stroke and TIA systolic blood pressure goals on 12-month mortality and recurrent vascular events
Source: PubMed Central journal article supplement — Stroke Vasc Neurol. 2024 Jan 8;9(5):e002759. doi: 10.1136/svn-2023-002759 (PMC11732840; doi:10.1136/svn-2023-002759), 2024-01-08
Supplement: svn-9-5-s001.pdf [file svn-9-5-s001.pdf]

**SUPPLEMENTAL MATERIAL**

| <b>Supplemental Table 1.</b> International Classification of Diseases-10 and Common Procedural Terminology Codes |                                                                                                                                                                                                                        |                                                                                                                                                                                                                                                                                 |
|------------------------------------------------------------------------------------------------------------------|------------------------------------------------------------------------------------------------------------------------------------------------------------------------------------------------------------------------|---------------------------------------------------------------------------------------------------------------------------------------------------------------------------------------------------------------------------------------------------------------------------------|
| Clinical Diagnosis                                                                                               | International Classification of Diseases-10 Codes                                                                                                                                                                      | Common Procedural Terminology Codes                                                                                                                                                                                                                                             |
| Ischemic stroke                                                                                                  | I63, I66, I67.89, I97.81, I97.82                                                                                                                                                                                       | --                                                                                                                                                                                                                                                                              |
| TIA                                                                                                              | G45.0, G45.1, G45.8, G45.9, I67.848                                                                                                                                                                                    | --                                                                                                                                                                                                                                                                              |
| Hemiplegia                                                                                                       | G81, G83, I69                                                                                                                                                                                                          | --                                                                                                                                                                                                                                                                              |
| Hypertension                                                                                                     | I10, I11, I12, I13, I14, I15                                                                                                                                                                                           | --                                                                                                                                                                                                                                                                              |
| Hyperlipidemia                                                                                                   | E78                                                                                                                                                                                                                    | --                                                                                                                                                                                                                                                                              |
| Diabetes                                                                                                         | E08, E09, E10, E11, E13                                                                                                                                                                                                | --                                                                                                                                                                                                                                                                              |
| Atrial fibrillation                                                                                              | I48                                                                                                                                                                                                                    | --                                                                                                                                                                                                                                                                              |
| Ventricular arrhythmia                                                                                           | I47, I49, I46.9                                                                                                                                                                                                        | --                                                                                                                                                                                                                                                                              |
| Congestive Heart Failure                                                                                         | I09.9, I11.0, I13.0, I13.2, I25.5, I42, I43, I50, P29.0                                                                                                                                                                | --                                                                                                                                                                                                                                                                              |
| Myocardial Infarction                                                                                            | I21, I22, I25.2                                                                                                                                                                                                        | --                                                                                                                                                                                                                                                                              |
| Acute Coronary Syndrome                                                                                          | I20                                                                                                                                                                                                                    | --                                                                                                                                                                                                                                                                              |
| Carotid endarterectomy/carotid stent                                                                             | 03C2, 03C3, 03C4, 03CH, 03CJ, 03CK, 03CL, 03CM, 03CN, 03H2, 03H3, 03H4, 03HH, 03HJ, 03HK, 03HL, 03HM, 03HN, 0312, 0313, 0314, 031H, 031J, 031K, 031L, 031M, 031N, 0372, 0372, 0374, 037H, 037J, 037K, 037L, 037M, 037N | 0075T, 0076T, 33621, 33891, 35501, 35506, 35507, 35508, 35509, 35510, 35511, 35512, 35515, 35516, 35526, 35601, 35606, 35612, 35616, 35626, 35642, 35645, 37205, 37206, 37207, 37208, 37215, 37216, 37221, 37223, 37226, 37227, 37230, 37231, 37234, 37235, 75960, 92980, 92981 |
| Peripheral Arterial Disease                                                                                      | I70, I71, I73.1, I73.8, I73.9, I77.1, I79.0, I79.2, K55.1, K55.8, K55.9, Z95.8, Z95.9                                                                                                                                  | --                                                                                                                                                                                                                                                                              |
| Obstructive Sleep Apnea                                                                                          | G47.3, G47.8, R06.81, R06.3                                                                                                                                                                                            | --                                                                                                                                                                                                                                                                              |
| Chronic Kidney Disease                                                                                           | N18, E08.22, E09.22, E10.22, E11.22, E13.22, I12, I13, Z99.2, Z94.0                                                                                                                                                    | --                                                                                                                                                                                                                                                                              |
| Current smoker                                                                                                   | (none)                                                                                                                                                                                                                 | --                                                                                                                                                                                                                                                                              |
| Alcohol dependence                                                                                               | F10 (except F10.9), Z71.41                                                                                                                                                                                             | --                                                                                                                                                                                                                                                                              |
| Dementia                                                                                                         | F01, F02, F03, F05.1, G30, G31.1                                                                                                                                                                                       | --                                                                                                                                                                                                                                                                              |
| Depression                                                                                                       | F31.3, F31.4, F31.5, F32, F33, F34.1, F43.21, F43.23                                                                                                                                                                   | --                                                                                                                                                                                                                                                                              |
