# Supplementary material for: Real-world analysis of two ischaemic stroke and TIA systolic blood pressure goals on 12-month mortality and recurrent vascular events
Source: PubMed Central journal article supplement — Stroke Vasc Neurol. 2024 Jan 8;9(5):e002759. doi: 10.1136/svn-2023-002759 (PMC11732840; doi:10.1136/svn-2023-002759), 2024-01-08
Supplement: svn-9-5-s002.pdf [file svn-9-5-s002.pdf]

**SUPPLEMENTAL MATERIAL**

**Supplemental Table 2.** Veterans Health Administration Outpatient Clinic Listing by Stop Code Where Hypertension Measurement Occurred\*

| Clinic Name | Stop Code                                                     |
|-------------|---------------------------------------------------------------|
| 303         | Cardiology                                                    |
| 305, 306    | Endocrinology                                                 |
| 309         | Hypertension                                                  |
| 312         | Pulmonary/Chest                                               |
| 313         | Renal/Nephrology (except dialysis)                            |
| 170         | Home Based Primary Care Physician                             |
| 172         | Home Based Primary Care Extender (NP, CNS, PA)                |
| 301         | General Internal Medicine                                     |
| 31          | Geriatric Consult Clinic                                      |
| 319         | Geriatric Evaluation & Management (inactive as of 04-01-2016) |
| 322         | Women's Health                                                |
| 323         | Primary Care/Medicine                                         |
| 348         | Primary Care Shared Appointment                               |
| 350         | GeriPACT                                                      |
| 531         | Mental Health Primary Care                                    |
| 315         | Neurology                                                     |

\* Abbreviations: Nurse Practitioner (NP), Clinical Nurse Specialist (CNS), Physician Assistant (PA), Patient Aligned Care Team (PACT)
