# Supplementary material for: Real-world analysis of two ischaemic stroke and TIA systolic blood pressure goals on 12-month mortality and recurrent vascular events
Source: PubMed Central journal article supplement — Stroke Vasc Neurol. 2024 Jan 8;9(5):e002759. doi: 10.1136/svn-2023-002759 (PMC11732840; doi:10.1136/svn-2023-002759), 2024-01-08
Supplement: svn-9-5-s003.pdf [file svn-9-5-s003.pdf]

**SUPPLEMENTAL MATERIAL**

| <b>Supplemental Table 3. Descriptive Table of Patient Characteristics Stratified by SBP Levels (N=12,337)*</b> |                  |             |              |             |            |              |          |
|----------------------------------------------------------------------------------------------------------------|------------------|-------------|--------------|-------------|------------|--------------|----------|
|                                                                                                                | SBP ≤ 105        | 105<SBP≤115 | 115<SBP≤130  | 130<SBP≤140 | SBP>140    | Total        | P-value† |
|                                                                                                                | Mean (SD) or (%) |             |              |             |            |              |          |
|                                                                                                                | 3.6              | 10.3        | 34.9         | 27.4        | 23.7       | 100          |          |
| <b>Characteristic</b>                                                                                          |                  |             |              |             |            |              |          |
| <i>Sociodemographic</i>                                                                                        |                  |             |              |             |            |              |          |
| Age                                                                                                            | 69.7 (11.3)      | 69.0 (11.3) | 68.3 (11.05) | 69 (10.8)   | 70 (10.2)  | 69.05 (10.8) | <0.001   |
| Sex, Male                                                                                                      | 95.1             | 94.4        | 95.4         | 95.4        | 95.5       | 95.3         | 0.62     |
| Race                                                                                                           |                  |             |              |             |            |              | <0.001   |
| White                                                                                                          | 78.4             | 73.0        | 71.8         | 69.5        | 66.3       | 70.2         |          |
| Black                                                                                                          | 17.8             | 21.1        | 23.1         | 25.3        | 28.1       | 24.5         |          |
| Asian                                                                                                          | 0.0              | 0.8         | 0.8          | 0.6         | 0.7        | 0.7          |          |
| Other                                                                                                          | 0.4              | 0.9         | 0.6          | 0.6         | 0.7        | 0.6          |          |
| Unknown                                                                                                        | 3.3              | 4.2         | 3.8          | 4.1         | 4.2        | 4.0          |          |
| Hispanic                                                                                                       | 8.9              | 8.4         | 8.3          | 7.0         | 6.3        | 7.5          | 0.008    |
| <i>Index Cerebrovascular Event – Final Diagnosis</i>                                                           |                  |             |              |             |            |              | 0.54     |
| Ischemic Stroke                                                                                                | 63.6             | 61.1        | 63.3         | 64.5        | 65.7       | 64.0         |          |
| TIA                                                                                                            | 36.4             | 38.9        | 36.7         | 35.5        | 34.3       | 36.0         |          |
| FY of Presentation                                                                                             |                  |             |              |             |            |              | 0.75     |
| FY2016                                                                                                         | 36.9             | 37.5        | 36.8         | 37.7        | 37.4       | 37.3         |          |
| FY2017                                                                                                         | 37.8             | 37.5        | 37.1         | 35.2        | 36.6       | 36.5         |          |
| FY2018                                                                                                         | 25.3             | 25.1        | 26.1         | 27.1        | 26.0       | 26.2         |          |
| <i>Healthcare Utilization</i>                                                                                  |                  |             |              |             |            |              |          |
| Number of Admissions in 1-Year prior to Presentation                                                           | 0.43 (0.98)      |             |              |             |            |              |          |
| Number of ED Presentations in 1-Year prior to Presentation                                                     | 1.5 (2.3)        | 1.0 (2.3)   | 1.25 (2.05)  | 1.0 (2.10)  | 1.0 (2.11) | 1.25 (2.12)  | 0.001    |
| Length of Hospitalization Stay (days)                                                                          | 5.0 (7.8)        | 4.0 (8.6)   | 5.0 (7.7)    | 4.0 (6.3)   | 4.0 (6.2)  | 3.9 (7.1)    | <0.001   |
| ED Presentation of Index Event                                                                                 | 88.0             | 90.5        | 90.9         | 91.2        | 91.4       | 91.0         | 0.19     |
| Hospital Admission of Index Event                                                                              | 84.9             | 83.0        | 83.2         | 84.0        | 83.4       | 83.5         | 0.80     |
| <i>Past Medical History†</i>                                                                                   |                  |             |              |             |            |              |          |
| Ischemic stroke                                                                                                | 60.2             | 54.5        | 56.0         | 56.4        | 58.4       | 56.7         | .059     |
| TIA                                                                                                            | 28.7             | 27.8        | 26.3         | 26.0        | 24.3       | 26.0         | .079     |
| Hemiplegia                                                                                                     | 36.4             | 34.7        | 34.6         | 33.4        | 34.5       | 34.3         | .67      |
| Hypertension                                                                                                   | 71.8             | 70.9        | 75.9         | 81.0        | 85.9       | 79.0         | <.001    |

|                                                                                                                                                                                                                                                                                                                                                                                                                                      |             |             |             |             |             |             |        |
|--------------------------------------------------------------------------------------------------------------------------------------------------------------------------------------------------------------------------------------------------------------------------------------------------------------------------------------------------------------------------------------------------------------------------------------|-------------|-------------|-------------|-------------|-------------|-------------|--------|
| Hyperlipidemia                                                                                                                                                                                                                                                                                                                                                                                                                       | 64.2        | 64.7        | 64.4        | 64.3        | 63.1        | 64.1        | .77    |
| Diabetes                                                                                                                                                                                                                                                                                                                                                                                                                             | 41.1        | 42.0        | 41.0        | 42.3        | 47.3        | 43.0        | <.001  |
| Atrial fibrillation                                                                                                                                                                                                                                                                                                                                                                                                                  | 21.8        | 17.9        | 14.5        | 11.9        | 12.5        | 13.9        | <.001  |
| Other arrhythmia                                                                                                                                                                                                                                                                                                                                                                                                                     | 11.8        | 13.6        | 11.4        | 10.2        | 9.9         | 11.0        | .003   |
| CHF                                                                                                                                                                                                                                                                                                                                                                                                                                  | 20.4        | 18.8        | 12.5        | 9.3         | 9.7         | 11.9        | <.001  |
| MI                                                                                                                                                                                                                                                                                                                                                                                                                                   | 7.3         | 8.5         | 6.2         | 5.4         | 6.1         | 6.2         | .003   |
| CEA/carotid stent                                                                                                                                                                                                                                                                                                                                                                                                                    | 2.0         | 0.9         | 0.8         | 0.7         | 0.9         | 0.9         | 0.097  |
| PAD                                                                                                                                                                                                                                                                                                                                                                                                                                  | 17.3        | 14.9        | 12.1        | 11.9        | 12.4        | 12.6        | .001   |
| OSA                                                                                                                                                                                                                                                                                                                                                                                                                                  | 14.9        | 16.1        | 16.8        | 15.9        | 14.5        | 15.9        | .11    |
| Chronic Kidney Disease                                                                                                                                                                                                                                                                                                                                                                                                               | 15.6        | 15.2        | 13.8        | 14.8        | 18.7        | 15.4        | <.001  |
| Current smoker                                                                                                                                                                                                                                                                                                                                                                                                                       | 37.3        | 36.5        | 33.7        | 32.9        | 31.1        | 33.3        | .003   |
| Alcohol dependence                                                                                                                                                                                                                                                                                                                                                                                                                   | 10.4        | 11.0        | 10.0        | 9.5         | 9.0         | 9.7         | .29    |
| Dementia                                                                                                                                                                                                                                                                                                                                                                                                                             | 14.7        | 9.3         | 6.7         | 6.8         | 6.6         | 7.3         | <.001  |
| Depression                                                                                                                                                                                                                                                                                                                                                                                                                           | 29.3        | 26.8        | 23.3        | 21.5        | 19.7        | 22.5        | <.001  |
| <i>Additional Clinical Indicators</i>                                                                                                                                                                                                                                                                                                                                                                                                |             |             |             |             |             |             |        |
| CCI                                                                                                                                                                                                                                                                                                                                                                                                                                  | 2.58 (2.40) | 2.00 (2.31) | 2.17 (2.18) | 2.00 (2.17) | 2.0 (2.25)  | 2.20 (2.22) | <0.001 |
| Modified APACHE III Score                                                                                                                                                                                                                                                                                                                                                                                                            | 8.82 (6.42) | 9.00 (6.58) | 9.09 (6.26) | 10.0 (6.11) | 11.0 (6.44) | 9.73 (6.36) | <0.001 |
| <i>Concomitant illness within 1-day of Cerebrovascular Event Presentation</i>                                                                                                                                                                                                                                                                                                                                                        |             |             |             |             |             |             |        |
| MI                                                                                                                                                                                                                                                                                                                                                                                                                                   | 3.1         | 3.1         | 2.3         | 2.4         | 2.9         | 2.6         | 0.360  |
| CHF                                                                                                                                                                                                                                                                                                                                                                                                                                  | 2.7         | 2.3         | 1.5         | 1.2         | 1.5         | 1.6         | 0.037  |
| * Abbreviations: Transient Ischemic Attack (TIA); standard deviation (SD); systolic blood pressure (SBP); fiscal year (FY); Emergency Department (ED); congestive heart failure (CHF); myocardial infarction (MI); carotid endarterectomy (CEA); peripheral arterial disease (PAD); obstructive sleep apnea (OSA); Charlson Comorbidity Index (CCI); Acute Physiology and Chronic Health Evaluation (APACHE); Veterans Affairs (VA). |             |             |             |             |             |             |        |
| †Past Medical History variables identified by <i>International Classification of Diseases, 9<sup>th</sup> Edition</i> code.                                                                                                                                                                                                                                                                                                          |             |             |             |             |             |             |        |
