# Supplementary material for: Real-world analysis of two ischaemic stroke and TIA systolic blood pressure goals on 12-month mortality and recurrent vascular events
Source: PubMed Central journal article supplement — Stroke Vasc Neurol. 2024 Jan 8;9(5):e002759. doi: 10.1136/svn-2023-002759 (PMC11732840; doi:10.1136/svn-2023-002759), 2024-01-08
Supplement: svn-9-5-s005.pdf [file svn-9-5-s005.pdf]

**SUPPLEMENTAL MATERIAL**

| <b>Supplemental Table 5. Multivariable Cox Proportional Hazard Regression for Cerebrovascular Recurrence, Cardiovascular Recurrence, and Both Combined, with Death as a Competing Risk – Full Table (N=12,337) *</b> |                                                             |                                                              |                                                                  |
|----------------------------------------------------------------------------------------------------------------------------------------------------------------------------------------------------------------------|-------------------------------------------------------------|--------------------------------------------------------------|------------------------------------------------------------------|
|                                                                                                                                                                                                                      | <b>Model 1 – Recurrent Cardiovascular Event<sup>†</sup></b> | <b>Model 2 – Recurrent Cerebrovascular Event<sup>‡</sup></b> | <b>Model 3 – Recurrence of Either Vascular Event<sup>§</sup></b> |
| Characteristic                                                                                                                                                                                                       | <b>HR (95% CI)</b>                                          |                                                              |                                                                  |
| <i>Systolic Blood Pressure Groupings (mmHg)</i>                                                                                                                                                                      |                                                             |                                                              |                                                                  |
| ≤ 105                                                                                                                                                                                                                | 0.90 (0.63,1.30)                                            | 0.87 (0.51, 1.47)                                            | 0.92 (0.55, 1.53)                                                |
| 106 to ≤ 115                                                                                                                                                                                                         | 0.95 (0.74,1.21)                                            | 0.99 (0.71, 1.38)                                            | 0.89 (0.62, 1.28)                                                |
| 116 to ≤ 130                                                                                                                                                                                                         | 0.92 (0.77, 1.10)                                           | <b>0.77 (0.60, 0.99)</b>                                     | 1.09 (0.84, 1.41)                                                |
| 131 to ≤ 140                                                                                                                                                                                                         | 1.02 (0.84, 1.23)                                           | 1.10 (0.86, 1.40)                                            | 0.89 (0.66, 1.19)                                                |
| > 140                                                                                                                                                                                                                | Ref                                                         | Ref                                                          | Ref                                                              |
| <i>Sociodemographic</i>                                                                                                                                                                                              |                                                             |                                                              |                                                                  |
| Age                                                                                                                                                                                                                  | <b>1.01 (1.00, 1.02)</b>                                    | <b>1.01 (1.00, 1.02)</b>                                     | <b>1.01 (1.00, 1.02)</b>                                         |
| Sex                                                                                                                                                                                                                  |                                                             |                                                              |                                                                  |
| Female                                                                                                                                                                                                               | Ref                                                         | Ref                                                          | Ref                                                              |
| Male                                                                                                                                                                                                                 | 0.79 (0.57, 1.10)                                           | 0.81 (0.54, 1.22)                                            | 0.81 (0.48, 1.37)                                                |
| Race                                                                                                                                                                                                                 |                                                             |                                                              |                                                                  |
| White                                                                                                                                                                                                                | Ref                                                         | Ref                                                          | Ref                                                              |
| Black                                                                                                                                                                                                                | 1.18 (1.01, 1.39)                                           | 1.33 (1.09, 1.63)                                            | 0.98 (0.76, 1.27)                                                |
| Asian                                                                                                                                                                                                                | 1.14 (0.51, 2.56)                                           | 1.50 (0.56, 4.02)                                            | 0.86 (0.21, 3.45)                                                |
| Other                                                                                                                                                                                                                | 0.56 (0.18, 1.79)                                           | 0.70 (0.18, 2.75)                                            | 0.39 (0.05, 2.96)                                                |
| Unknown                                                                                                                                                                                                              | 1.15 (0.82, 1.62)                                           | 0.82 (0.48, 1.40)                                            | 1.58 (1.01, 2.46)                                                |
| Hispanic                                                                                                                                                                                                             |                                                             |                                                              |                                                                  |
| No                                                                                                                                                                                                                   | Ref                                                         | Ref                                                          | Ref                                                              |
| Yes                                                                                                                                                                                                                  | 1.06 (0.83, 1.36)                                           | 1.15 (0.82, 1.61)                                            | 1.06 (0.73, 1.54)                                                |
| <i>Healthcare Utilization</i>                                                                                                                                                                                        |                                                             |                                                              |                                                                  |
| Number of ED Presentations in 1-Year prior to Presentation                                                                                                                                                           | <b>1.09 (1.07, 1.11)</b>                                    | <b>1.07 (1.05, 1.10)</b>                                     | <b>1.11 (1.08, 1.13)</b>                                         |
| ED Presentation of Index Event                                                                                                                                                                                       |                                                             |                                                              |                                                                  |
| No                                                                                                                                                                                                                   | Ref                                                         |                                                              |                                                                  |
| Yes                                                                                                                                                                                                                  | <b>1.33 (1.02, 1.73)</b>                                    | —                                                            | —                                                                |
| <i>Past Medical History<sup>  </sup></i>                                                                                                                                                                             |                                                             |                                                              |                                                                  |
| Ischemic Stroke                                                                                                                                                                                                      |                                                             |                                                              |                                                                  |
| No                                                                                                                                                                                                                   | —                                                           | Ref                                                          | —                                                                |
| Yes                                                                                                                                                                                                                  | —                                                           | <b>1.26 (1.04, 1.52)</b>                                     |                                                                  |
| Hemiplegia                                                                                                                                                                                                           |                                                             |                                                              |                                                                  |
| No                                                                                                                                                                                                                   | —                                                           | —                                                            | Ref                                                              |
| Yes                                                                                                                                                                                                                  | —                                                           | —                                                            | <b>0.72 (0.58, 0.90)</b>                                         |
| Diabetes                                                                                                                                                                                                             |                                                             |                                                              |                                                                  |
| No                                                                                                                                                                                                                   | Ref                                                         | Ref                                                          | —                                                                |
| Yes                                                                                                                                                                                                                  | <b>1.28 (1.10, 1.50)</b>                                    | <b>1.47 (1.23, 1.77)</b>                                     | —                                                                |
| Atrial Fibrillation                                                                                                                                                                                                  |                                                             |                                                              |                                                                  |

|                                                                               |                          |                          |                          |
|-------------------------------------------------------------------------------|--------------------------|--------------------------|--------------------------|
| No                                                                            | Ref                      |                          | Ref                      |
| Yes                                                                           | <b>1.34 (1.12, 1.59)</b> | —                        | <b>1.65 (1.29, 2.12)</b> |
| CHF                                                                           |                          |                          |                          |
| No                                                                            | Ref                      |                          | Ref                      |
| Yes                                                                           | <b>1.76 (1.46, 2.12)</b> |                          | <b>2.77 (2.13, 3.61)</b> |
| MI                                                                            |                          |                          |                          |
| No                                                                            | Ref                      | —                        | Ref                      |
| Yes                                                                           | <b>1.45 (1.17, 1.80)</b> | —                        | <b>1.65 (1.23, 2.21)</b> |
| Current Smoker                                                                |                          |                          |                          |
| No                                                                            | —                        | Ref                      | —                        |
| Yes                                                                           | —                        | <b>1.32 (1.09, 1.61)</b> | —                        |
| CCI                                                                           | <b>1.05 (1.02, 1.09)</b> | —                        | <b>1.10 (1.05, 1.14)</b> |
| APACHE                                                                        | <b>1.01 (1.00, 1.02)</b> | —                        | <b>1.02 (1.01, 1.04)</b> |
| <i>Concomitant illness within 1-day of Cerebrovascular Event Presentation</i> |                          |                          |                          |
| No                                                                            | Ref                      |                          | Ref                      |
| Yes                                                                           | <b>1.71 (1.24, 2.34)</b> | —                        | <b>1.90 (1.31, 2.76)</b> |

\* Abbreviations: Hazard ratio (HR); confidence interval (CI); Ref (referent); Emergency Department (ED); congestive heart failure (CHF); myocardial infarction (MI); Charlson Comorbidity Index (CCI); Acute Physiology and Chronic Health Evaluation (APACHE).

† Model 1 – Recurrent cerebrovascular events only with death as a competing risk.

‡ Model 2 – Recurrent cardiovascular events only with death as a competing risk.

§ Model 3 – Combined recurrent cerebrovascular events and recurrent cardiovascular events with death as a competing risk.

|| Past Medical History variables identified by *International Classification of Diseases, 9<sup>th</sup> Edition* code.
