# Supplementary material for: Real-world analysis of two ischaemic stroke and TIA systolic blood pressure goals on 12-month mortality and recurrent vascular events
Source: HighWire-hosted journal article supplement (doi:10.1136/svn-2023-002759), 2024-01-08
Supplement: svn-2023-002759supp002_data_supplement.pdf [file svn-2023-002759supp002_data_supplement.pdf]

**SUPPLEMENTAL MATERIAL**

| <b>Supplemental Table 2.</b> Veterans Health Administration Outpatient Clinic Listing by Stop Code Where Hypertension Measurement Occurred* |                                                               |
|---------------------------------------------------------------------------------------------------------------------------------------------|---------------------------------------------------------------|
| Clinic Name                                                                                                                                 | Stop Code                                                     |
| 303                                                                                                                                         | Cardiology                                                    |
| 305, 306                                                                                                                                    | Endocrinology                                                 |
| 309                                                                                                                                         | Hypertension                                                  |
| 312                                                                                                                                         | Pulmonary/Chest                                               |
| 313                                                                                                                                         | Renal/Nephrology (except dialysis)                            |
| 170                                                                                                                                         | Home Based Primary Care Physician                             |
| 172                                                                                                                                         | Home Based Primary Care Extender (NP, CNS, PA)                |
| 301                                                                                                                                         | General Internal Medicine                                     |
| 31                                                                                                                                          | Geriatric Consult Clinic                                      |
| 319                                                                                                                                         | Geriatric Evaluation & Management (inactive as of 04-01-2016) |
| 322                                                                                                                                         | Women's Health                                                |
| 323                                                                                                                                         | Primary Care/Medicine                                         |
| 348                                                                                                                                         | Primary Care Shared Appointment                               |
| 350                                                                                                                                         | GeriPACT                                                      |
| 531                                                                                                                                         | Mental Health Primary Care                                    |
| 315                                                                                                                                         | Neurology                                                     |

\* Abbreviations: Nurse Practitioner (NP), Clinical Nurse Specialist (CNS), Physician Assistant (PA), Patient Aligned Care Team (PACT)
